# Supplementary material
Source: MDPI journal article supplement (https://www.mdpi.com/2073-4352/12/9/1289)
Supplement: s1 [file s1]

## Supporting Information

### **Two-dimensional metal-organic frameworks $\text{TM}_3\text{C}_{12}\text{O}_{12}$ (TM= Mn, Co, Fe, Ni) as high-efficiency bifunctional electrocatalysts for water splitting**

Quan Li<sup>1</sup>, Zhen Feng,<sup>1, 2\*</sup> and Dianhui Wang<sup>3</sup>

<sup>1</sup> Henan Institute of Technology, Xinxiang, Henan 453000, China. E-mail: 13839089391@hait.edu.cn

<sup>2</sup> School of Physics, Henan Normal University, Xinxiang, Henan 453007, China

<sup>3</sup> Anyang Research Institute of Ecologic and Environmental science, Anyang 455000, Henan, China

\* Correspondence: fengzhen@hait.edu.cn;

## Supplementary Figures

| Materials | Adsorbate/ site | Top view                                                                            | Side view                                                                             |
|-----------|-----------------|-------------------------------------------------------------------------------------|---------------------------------------------------------------------------------------|
| Mn-O-MOF  | -               | 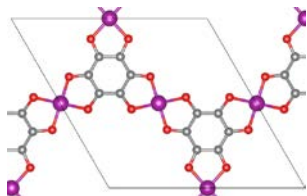   |    |
| Mn-O-MOF  | H/ Mn           |    |    |
| Mn-O-MOF  | H/ O            |   |   |
| Mn-O-MOF  | H/ C            |  |  |
| Mn-O-MOF  | OOH/Mn          |  |  |
| Mn-O-MOF  | OH/Mn           |  |  |
| Mn-O-MOF  | O/Mn            |  |  |

**Figure S1.** The optimized top and side views of H, OOH, O, and OH on Mn-O MOF monolayer.

| Materials | Adsorbate/ Site | Top view                                                                            | Side view                                                                             |
|-----------|-----------------|-------------------------------------------------------------------------------------|---------------------------------------------------------------------------------------|
| Co-O-MOF  | -               | 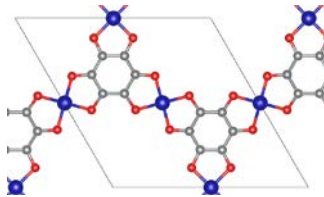   |    |
| Co-O-MOF  | H/ Co           |    |    |
| Co-O-MOF  | H/ O            |    |    |
| Co-O-MOF  | H/C             |   |   |
| Co-O-MOF  | OOH/Co          |  |  |
| Co-O-MOF  | OH/Co           |  |  |
| Co-O-MOF  | O/Co            |  |  |

**Figure S2.** The optimized top and side views of H, OOH, O, and OH on Co-O MOF monolayer.

| Materials | Adsorbate/ site | Top view                                                                            | Side view                                                                             |
|-----------|-----------------|-------------------------------------------------------------------------------------|---------------------------------------------------------------------------------------|
| Fe-O-MOF  | -               | 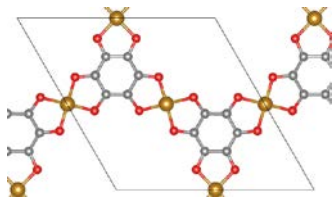   |    |
| Fe-O-MOF  | H/ Fe           |    |    |
| Fe-O-MOF  | H/ O            |    |    |
| Fe-O-MOF  | H/C             |   |   |
| Fe-O-MOF  | OOH/Fe          |  |  |
| Fe-O-MOF  | OH/Fe           |  |  |
| Fe-O-MOF  | O/Fe            |  |  |

**Figure S3.** The optimized top and side views of H, OOH, O, and OH on Fe-O MOF monolayer.

| Materials | Adsorbate/ site | Top view                                                                            | Side view                                                                             |
|-----------|-----------------|-------------------------------------------------------------------------------------|---------------------------------------------------------------------------------------|
| Ni-O-MOF  | -               | 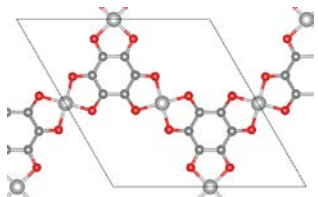   |    |
| Ni-O-MOF  | H/ Ni           |    |    |
| Ni-O-MOF  | H/ O            |    |    |
| Ni-O-MOF  | H/C             |   |   |
| Ni-O-MOF  | OOH/Ni          |  |  |
| Ni-O-MOF  | OH/Ni           |  |  |
| Ni-O-MOF  | O/Ni            |  |  |

**Figure S4.** The optimized top and side views of H, OOH, O, and OH on Ni-O MOF monolayer.
